# Supplementary material for: Oxidation of copper nanoparticles in water: mechanistic insights revealed by oxygen uptake and spectroscopic methods
Source: Royal Society of Chemistry journal article supplement (doi:10.1039/c3dt32836h), 2013-01-01
Supplement: c3dt32836h.pdf [file c3dt32836h.pdf]

Supplementary Information for:

## **Oxidation of copper nanoparticles in water: Mechanistic insights revealed by oxygen uptake and spectroscopic methods**

Natalia L. Pacioni, Vasilisa Filippenko, Nathalie Presseau and J. C. Scaiano\*

*<sup>a</sup> Centre for Catalysis Research and Innovation, Department of Chemistry, University of Ottawa, 10 Marie Curie, Ottawa, K1N 6N5, Canada. E-mail: [tito@photo.chem.uottawa.ca](mailto:tito@photo.chem.uottawa.ca)*

### **Contents**

**S2- Kinetics profile for CuNP oxidation followed at different temperatures.**

**S3- Electron paramagnetic resonance of Cu<sup>2+</sup> after addition of ascorbic acid.**

**Kinetics profile for CuNP oxidation followed at different temperatures.**

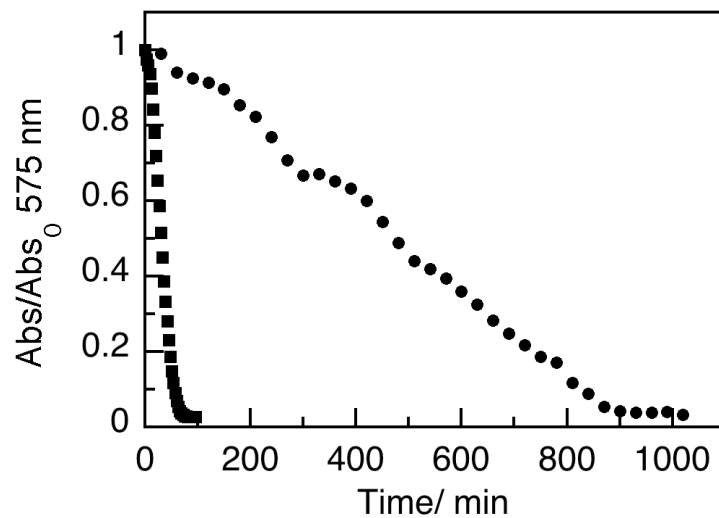

**Figure S1.** Relative absorbance at 575 nm showing consumption of CuNP upon air exposure at 5°C (•) and at 45°C (■).

**Electron paramagnetic resonance of  $\text{Cu}^{2+}$  after addition of ascorbic acid.**

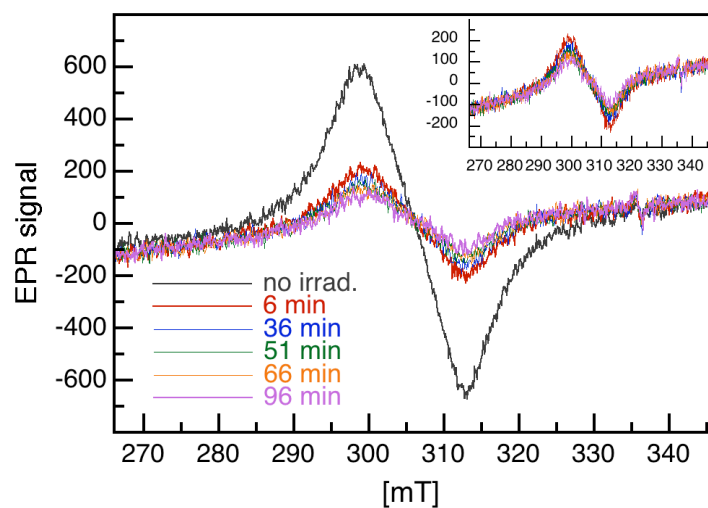

**Figure S2.** EPR spectra of 0.66 mM  $\text{CuSO}_4$  at different times after the addition of 1 mM ascorbic acid showing the consumption of  $\text{Cu}^{2+}$ .
